# Supplementary material for: Amorphous MnO2 surviving calcination: an efficient catalyst for ozone decomposition
Source: Royal Society of Chemistry journal article supplement (doi:10.1039/c9cy01426h), 2019-01-01
Supplement: c9cy01426h1.pdf [file c9cy01426h1.pdf]

**Electronic Supplementary Information**

**Amorphous MnO<sub>2</sub> surviving calcination: An efficient  
catalyst for ozone decomposition**

Y Yi Yu<sup>a</sup>, Shuilian Liu<sup>a</sup>, Jian Ji<sup>a,\*</sup>, Haibao Huang<sup>a,b\*</sup>

*<sup>a</sup>School of Environmental Science and Engineering, Sun Yat-sen University, 132 East*

*Waihuan Road, Guangzhou 510006, China*

*<sup>b</sup>Guangdong Provincial Key Laboratory of Environmental Pollution Control and Remediation*

*Technology, Guangzhou 510006, China*

---

\*Corresponding author. Tel & Fax: +86-020-39336475, E-mail: [seabao8@gmail.com](mailto:seabao8@gmail.com) (H Huang),  
[jjjian@mail.sysu.edu.cn](mailto:jjjian@mail.sysu.edu.cn) (J Ji).

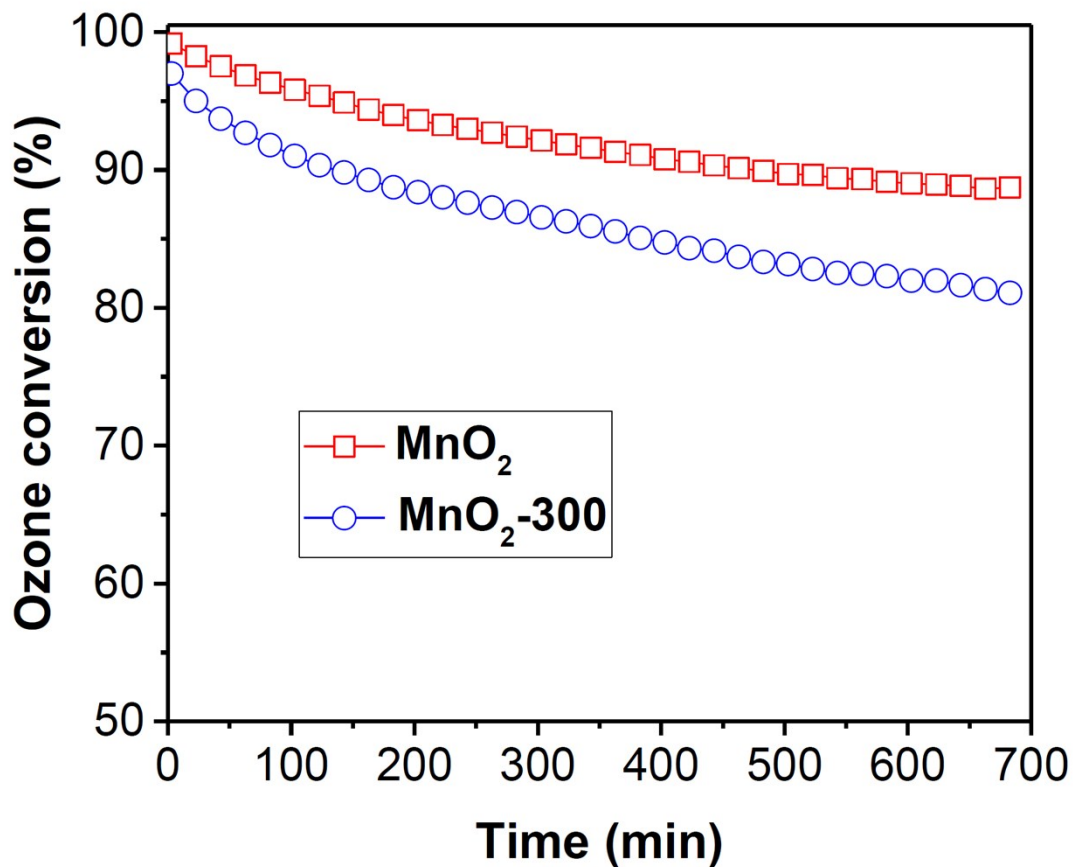

**Fig. 1** Ozone conversion as a function of time over MnO<sub>2</sub> and MnO<sub>2</sub>-300 (Reaction condition: initial concentration of ozone, 100 ppm; catalyst weight, 20 mg; temperature, 25 °C; GHSV, 3000,000 mL/(g·h); RH=0%).
